# Supplementary material for: Characterization of Fusarium acuminatum: A Potential Enniatins Producer in Tunisian Wheat
Source: MDPI journal article supplement (doi:10.3390/jof8050458), 2022-04-28
Supplement: s1 [file s1]

**Table S1.** Molecular identification of the *Fusarium* sp. isolates based on ITS and  $\beta$ -tubulin sequence analysis.

| Isolate                         | $\beta$ -tub sequence                |            |                             |                       |
|---------------------------------|--------------------------------------|------------|-----------------------------|-----------------------|
|                                 | Lineage organism                     | Nb of hits | Lineage organism *          | Nb of hits            |
| 3T                              | <i>F. sambucinum</i> species complex | 152        | <i>F. pseudograminearum</i> | 78                    |
| 4T                              | <i>F. sambucinum</i> species complex | 152        | <i>F. pseudograminearum</i> | 78                    |
| 32T                             | <i>F. tricinctum</i> species complex | 66         | <i>F. acuminatum</i>        | 55                    |
| 33T                             | <i>F. tricinctum</i> species complex | 64         | <i>F. acuminatum</i>        | 51                    |
| Best nr database similarity hit |                                      |            |                             |                       |
|                                 | Taxon                                | E value    | ID %                        | GenBank Accession No. |
| 3T                              | <i>F. culmorum</i>                   | 4e-100     | 100                         | LT598662.1            |
| 4T                              | <i>F. culmorum</i>                   | 5e-99      | 99.04                       | LT598662.1            |
| 32T                             | <i>F. acuminatum</i>                 | 5e-68      | 96.88                       | MH341248.1            |
| 33T                             | <i>F. acuminatum</i>                 | 8e-92      | 98.48                       | MH341248.1            |
|                                 | ITS sequence                         |            |                             |                       |
|                                 | Lineage organism                     | Nb of hits | Lineage organism *          | Nb of hits            |
| 3T                              | Sordariomycetes                      | 101        | <i>F. graminearum</i>       | 49                    |
| 4T                              | Sordariomycetes                      | 101        | <i>F. graminearum</i>       | 56                    |
| 32T                             | <i>F. tricinctum</i> species complex | 72         | <i>F. acuminatum</i>        | 54                    |
| 33T                             | <i>F. tricinctum</i> species complex | 95         | <i>F. acuminatum</i>        | 49                    |
| Best nr database similarity hit |                                      |            |                             |                       |
|                                 | Taxon                                | E value    | ID %                        | GenBank Accession No. |
| 3T                              | <i>F. graminearum</i>                | 0          | 99.76                       | MT598163.1            |
| 4T                              | <i>F. graminearum</i>                | 0          | 99.76                       | MT598163.1            |
| 32T                             | <i>F. acuminatum</i>                 | 0          | 100                         | MT635295.1            |
| 33T                             | <i>F. acuminatum</i>                 | 0          | 100                         | MT635295.1            |

\* Species with the highest number of hits
